# Supplementary material for: Changes in physiological activities and root exudation profile of two grapevine rootstocks reveal common and specific strategies for Fe acquisition
Source: PubMed Central journal article supplement (PMC7606434; doi:10.1038/s41598-020-75317-w), 2020-11-02
Supplement: 41598_2020_75317_MOESM2_ESM.pdf [file 41598_2020_75317_MOESM2_ESM.pdf]

## **Changes in physiological activities and root exudation profile of two grapevine rootstocks reveal common and specific strategies for Fe acquisition**

Laura Marastoni<sup>1a</sup>, Luigi Lucini<sup>2a</sup>, Begoña Miras-Moreno<sup>2</sup>, Marco Trevisan<sup>2</sup>, Davide Segal<sup>1</sup>, Anita Zamboni<sup>1\*</sup>, Zeno Varanini<sup>1</sup>

<sup>1</sup>Biotechnology Department, University of Verona, Italy

<sup>2</sup>Department for Sustainable Food Process, University Cattolica del Sacro Cuore, Piacenza, Italy

**Supplementary Information**

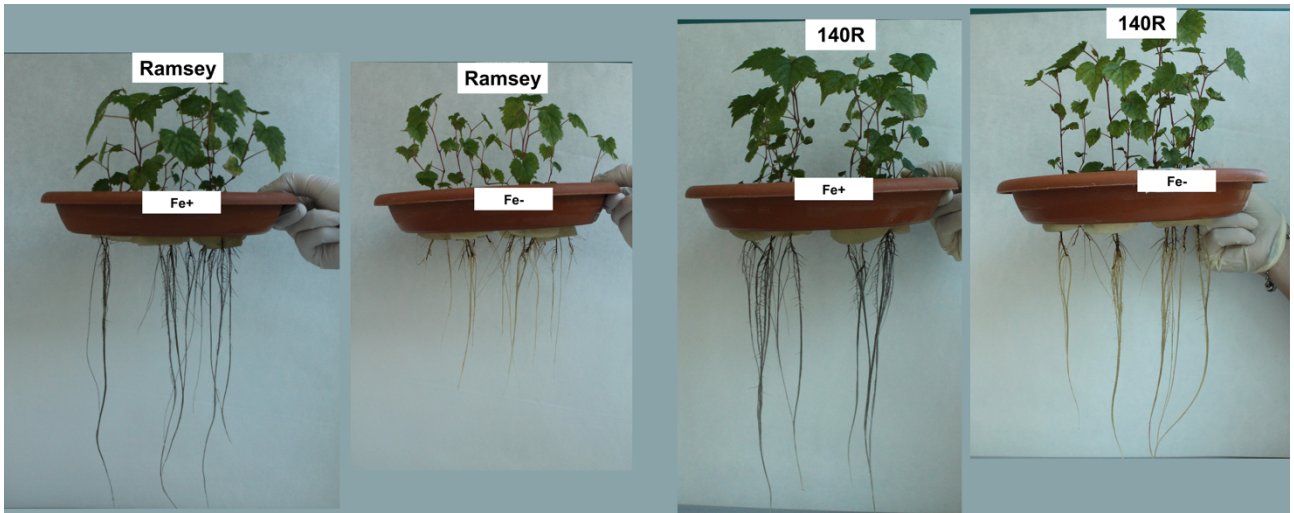

**Supplementary Fig. S1. Microcuttings of Ramsey and 140R at the end of experiments grown in presence (Fe+) and absence of Fe (Fe-).**

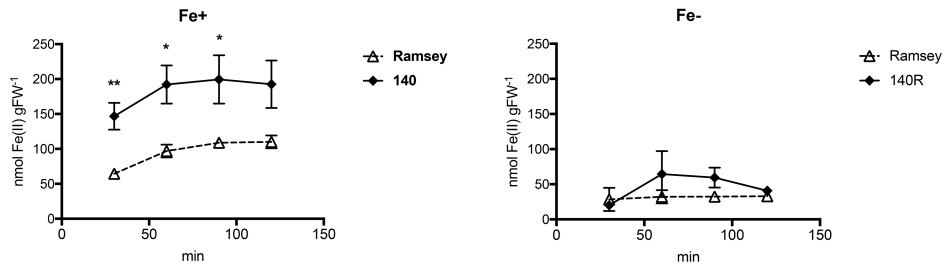

**Supplementary Fig. S2. Time-course of root FCR activity.** Comparison of reduction of Fe(III)-EDTA activity by root apparatus measured after 30, 60, 90 and 120 min and expressed as nmol Fe(II) gFW<sup>-1</sup> between Ramsey and 140R microcuttings grown under Fe-sufficient (Fe+) and Fe-deficient (Fe-) condition. The statistical significance was determined by Student's t-test (mean  $\pm$  SE, n= 4 plants, \* P < 0.05. \*\*, P < 0.01).

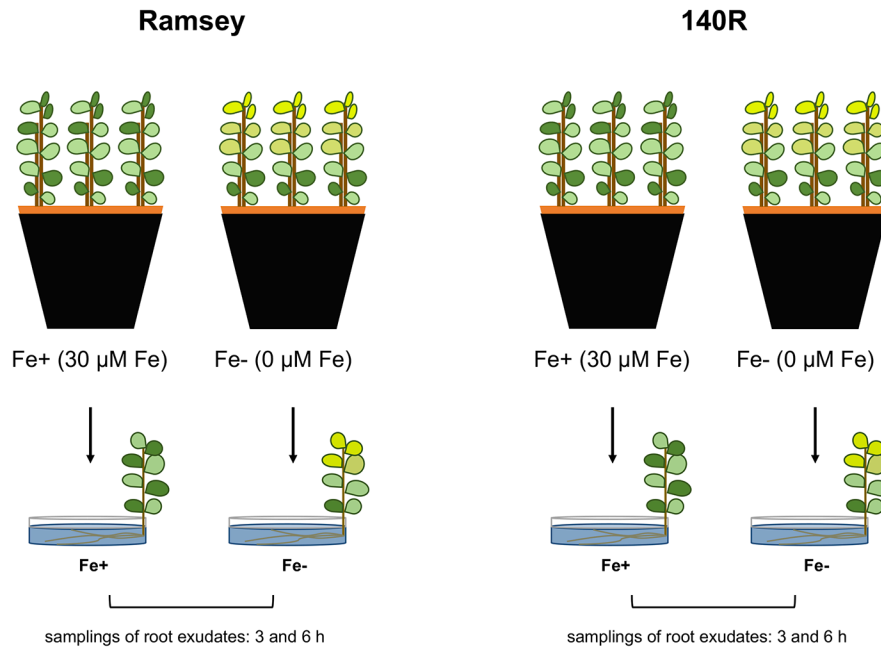

**Supplementary Fig. S3. Scheme of root exudate collection.** Metabolite dataset was obtained through UPLC/Q-TOF analysis of root exudates sampled after 3 h and 6 h from microcuttings of Ramsey and 140R grown with Fe or without Fe.

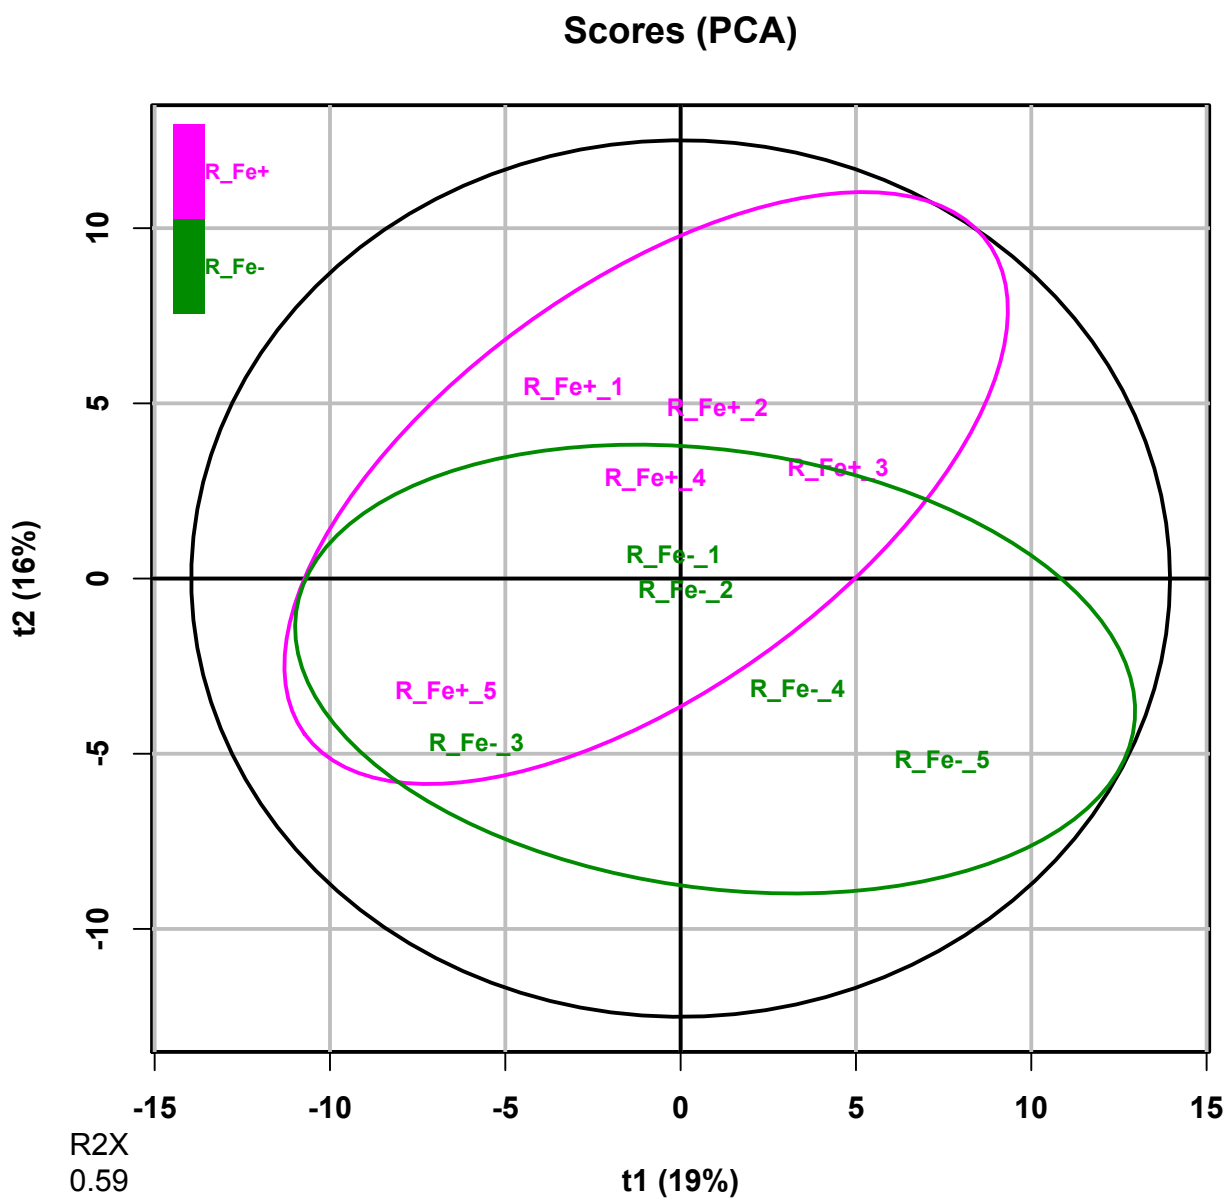

**Supplementary Fig. S4. Score scatter plot of PCA model of root exudate samples of Ramsey rootstocks sampled at 3 h.** PCA model ( $R^2X=0.59$ , 4 PCs; scaling: mean-centering and unit variance scaling) of root exudates collected at 3 h from Fe-deficient and Fe-sufficient Ramsey microcuttings.

### Scores (OPLS-DA)

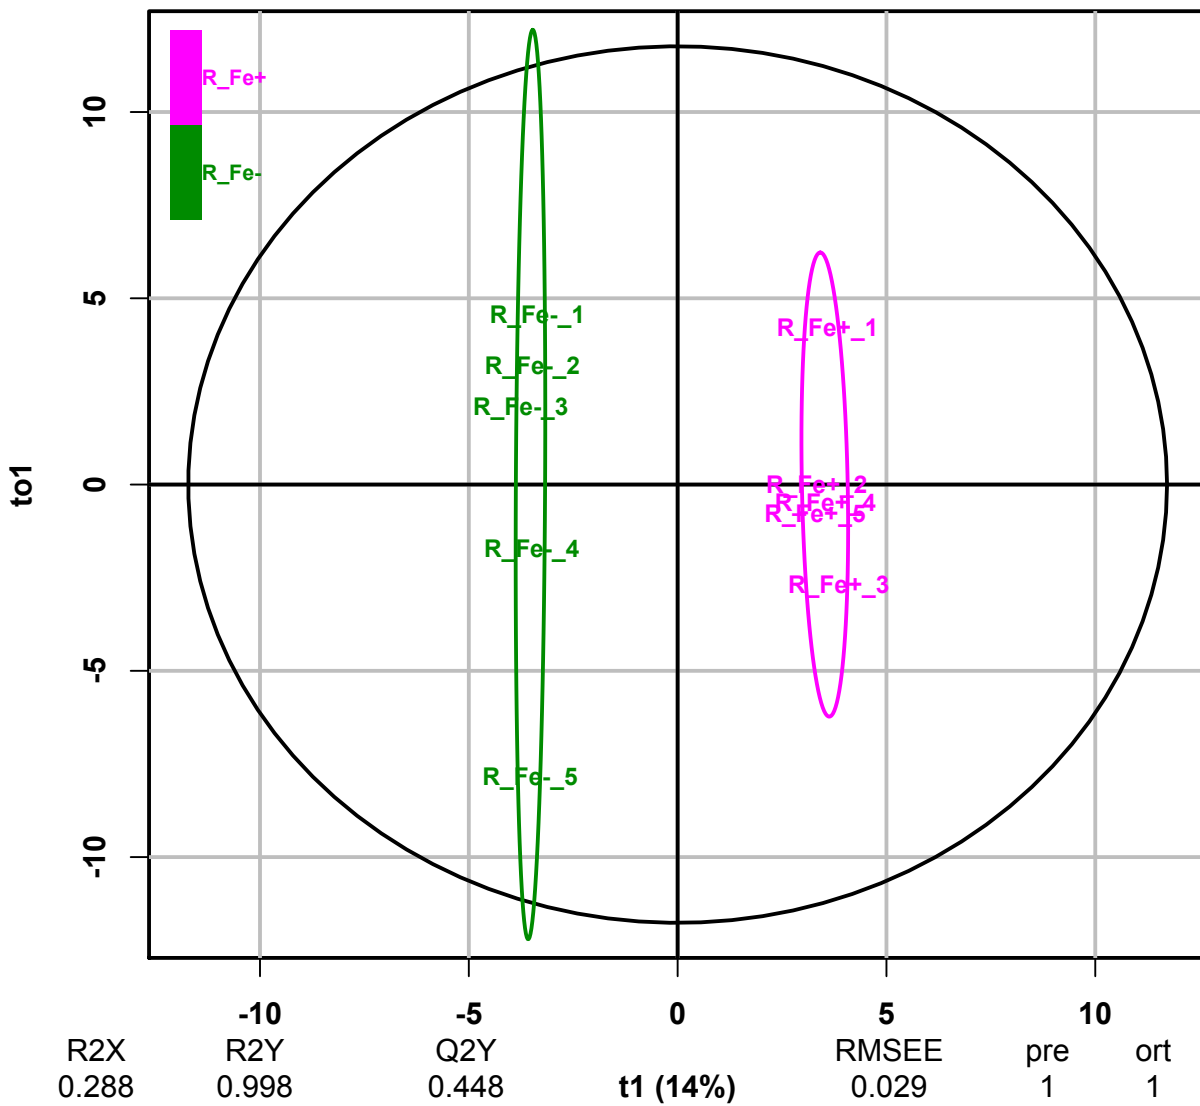

**Supplementary Fig. S5. Score scatter plot of OPLS-DA model of root exudate samples of Ramsey rootstocks sampled at 3 h. OPLS-DA model (1P+1O,  $R^2X(\text{cum})= 0.288$ ,  $R^2Y(\text{cum})= 0.998$ ,  $Q^2(\text{cum})= 0.448$ ,  $RMSEE= 0.029$ ; scaling: mean-centering and unit variance scaling) of root exudates collected at 3 h from Fe-deficient and Fe-sufficient Ramsey microcuttings.**

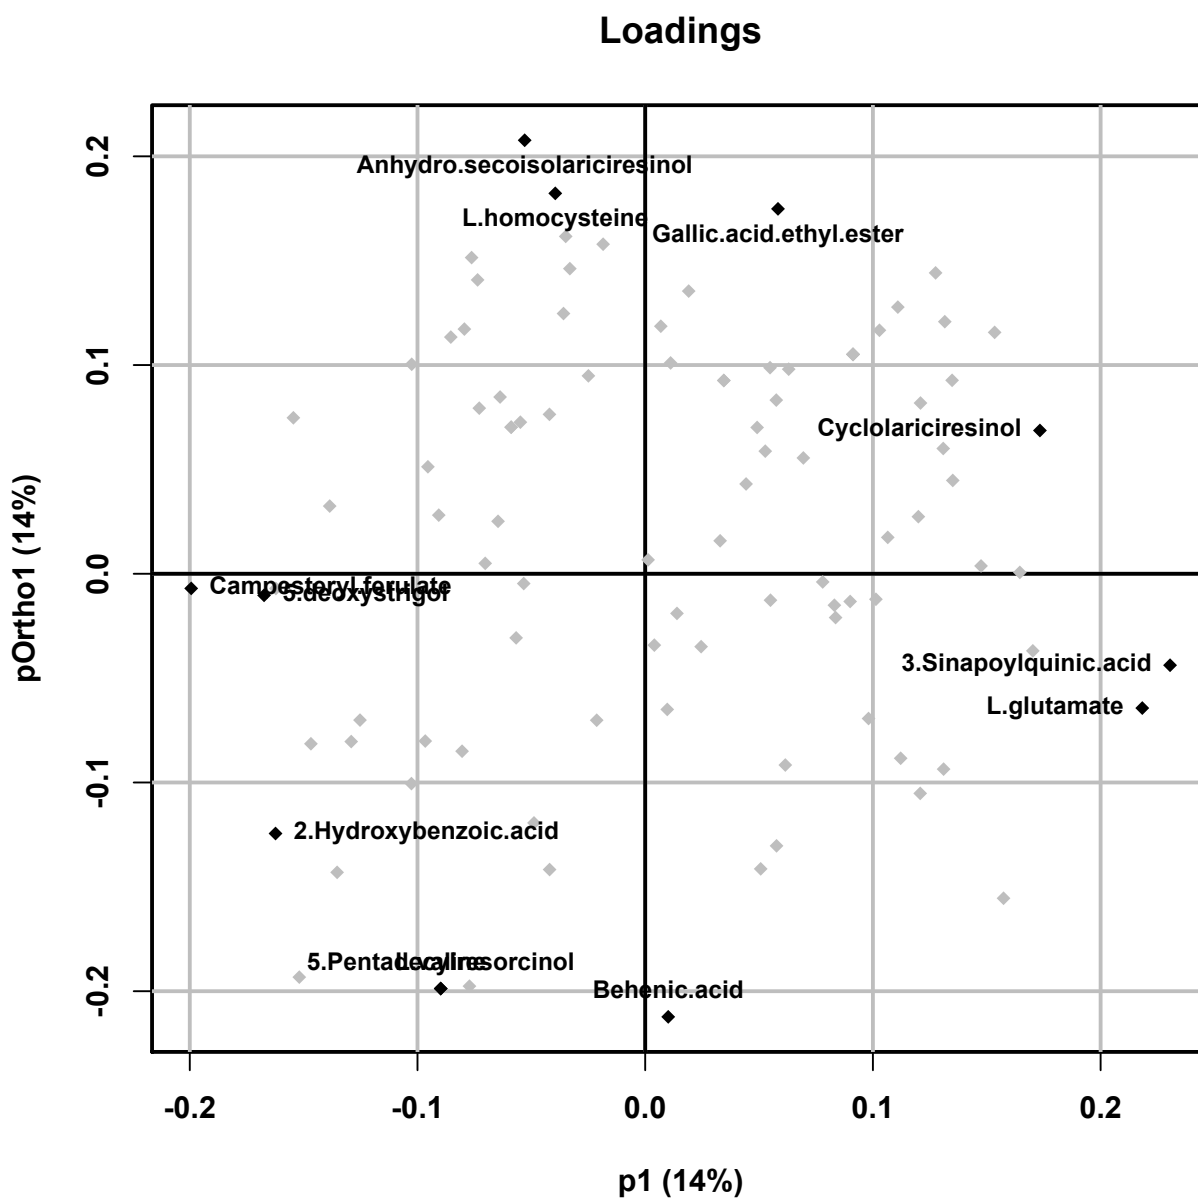

**Supplementary Fig. S6. Loading plot of OPLS-DA model of root exudate samples of Ramsey rootstocks sampled at 3 h.** OPLS-DA model (1P+1O,  $R^2X(\text{cum})= 0.288$ ,  $R^2Y(\text{cum})= 0.998$ ,  $Q^2(\text{cum})= 0.448$ ,  $\text{RMSEE}= 0.029$ ; scaling: mean-centering and unit variance scaling) of root exudates collected at 3 h from root exudates of Fe-deficient and Fe-sufficient Ramsey microcuttings.

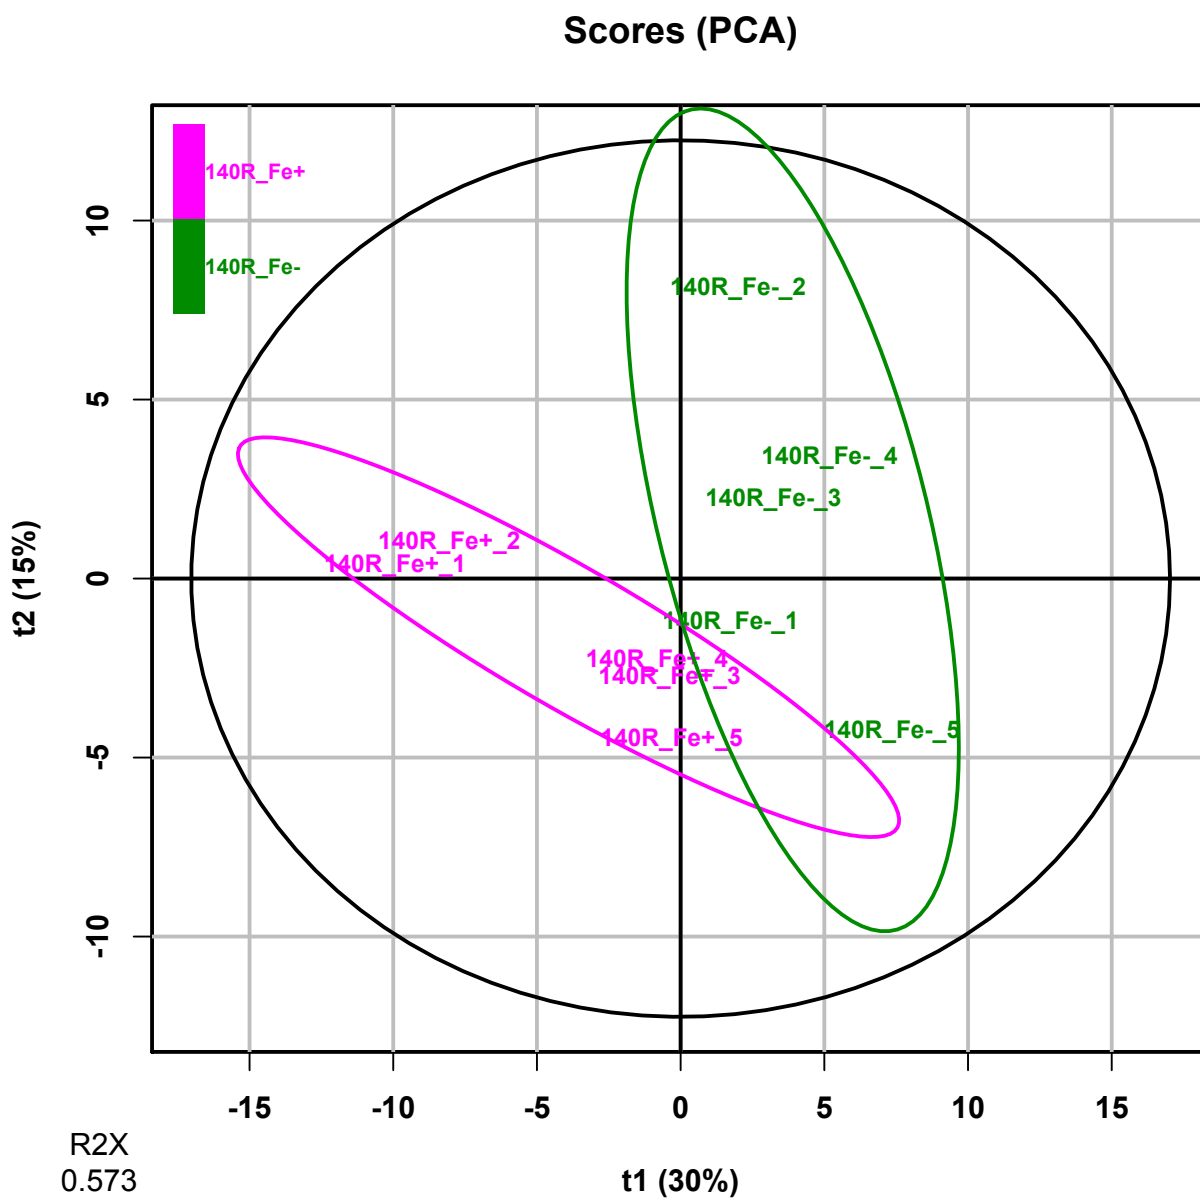

**Supplementary Fig. S7.** Score scatter plot of PCA model of root exudate samples of 140R rootstocks sampled at 3 h. PCA model ( $R^2X_{(cum)} = 0.573$ , 3 PCs; scaling: mean-centering and unit variance scaling) of root exudates collected at 3 h from Fe-deficient and Fe-sufficient 140R microcuttings.



### Scores (OPLS-DA)

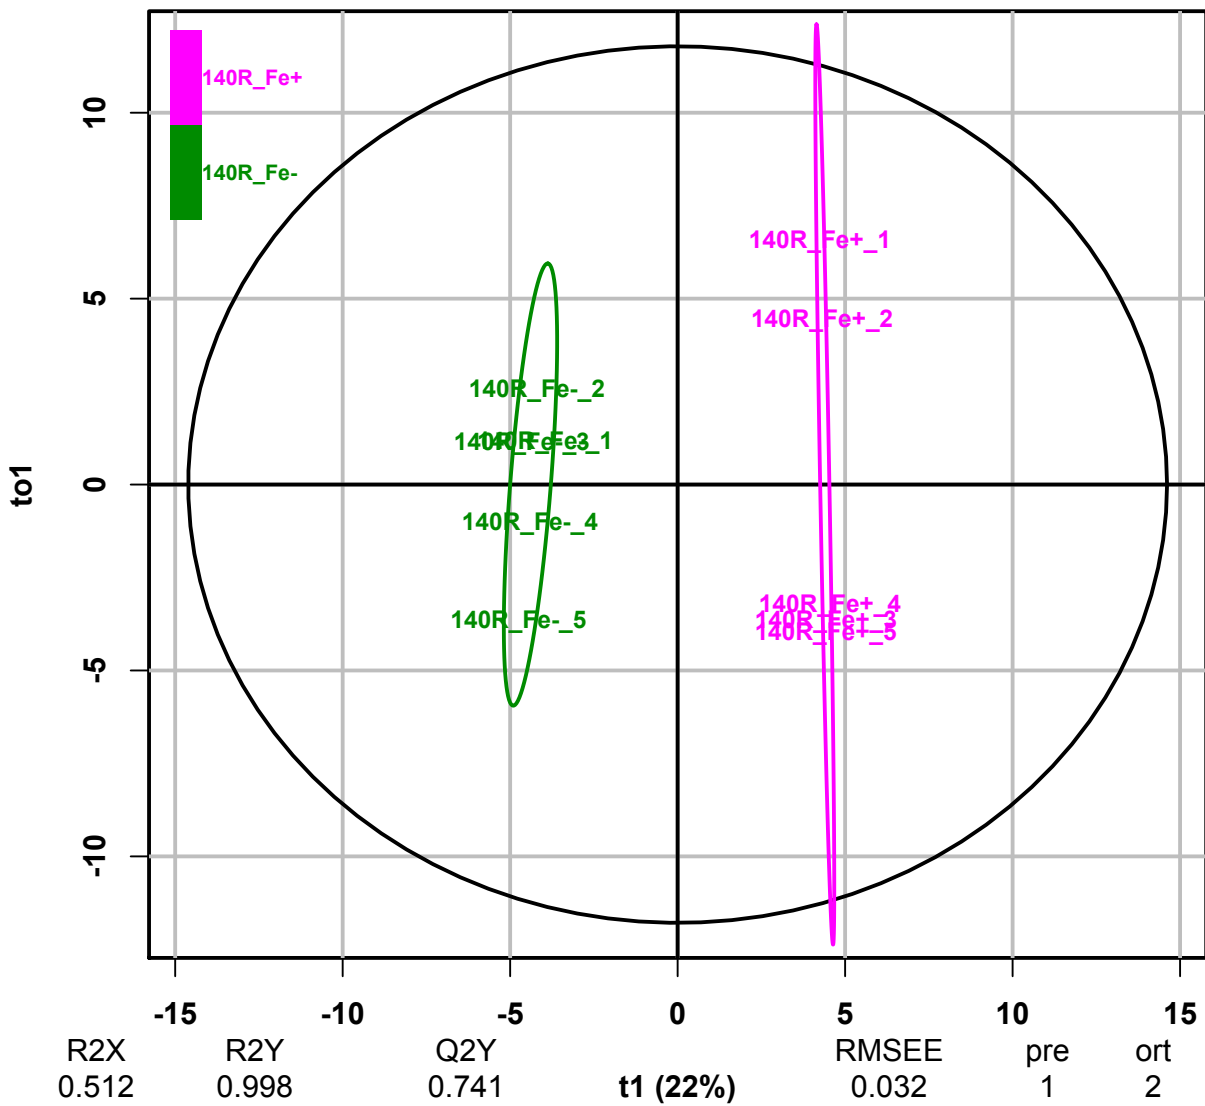

**Supplementary Fig. S8. Score scatter plot of OPLS-DA model of root exudate samples of 140R rootstocks sampled at 3 h.** OPLS-DA model (1P+2O,  $R^2X(\text{cum})= 0.512$ ,  $R^2Y(\text{cum})= 0.998$ ,  $Q^2(\text{cum})= 0.741$ , RMSEE= 0.032; scaling: mean-centering and unit variance scaling) of root exudates collected at 3 h from Fe-deficient and Fe-sufficient 140R microcuttings.

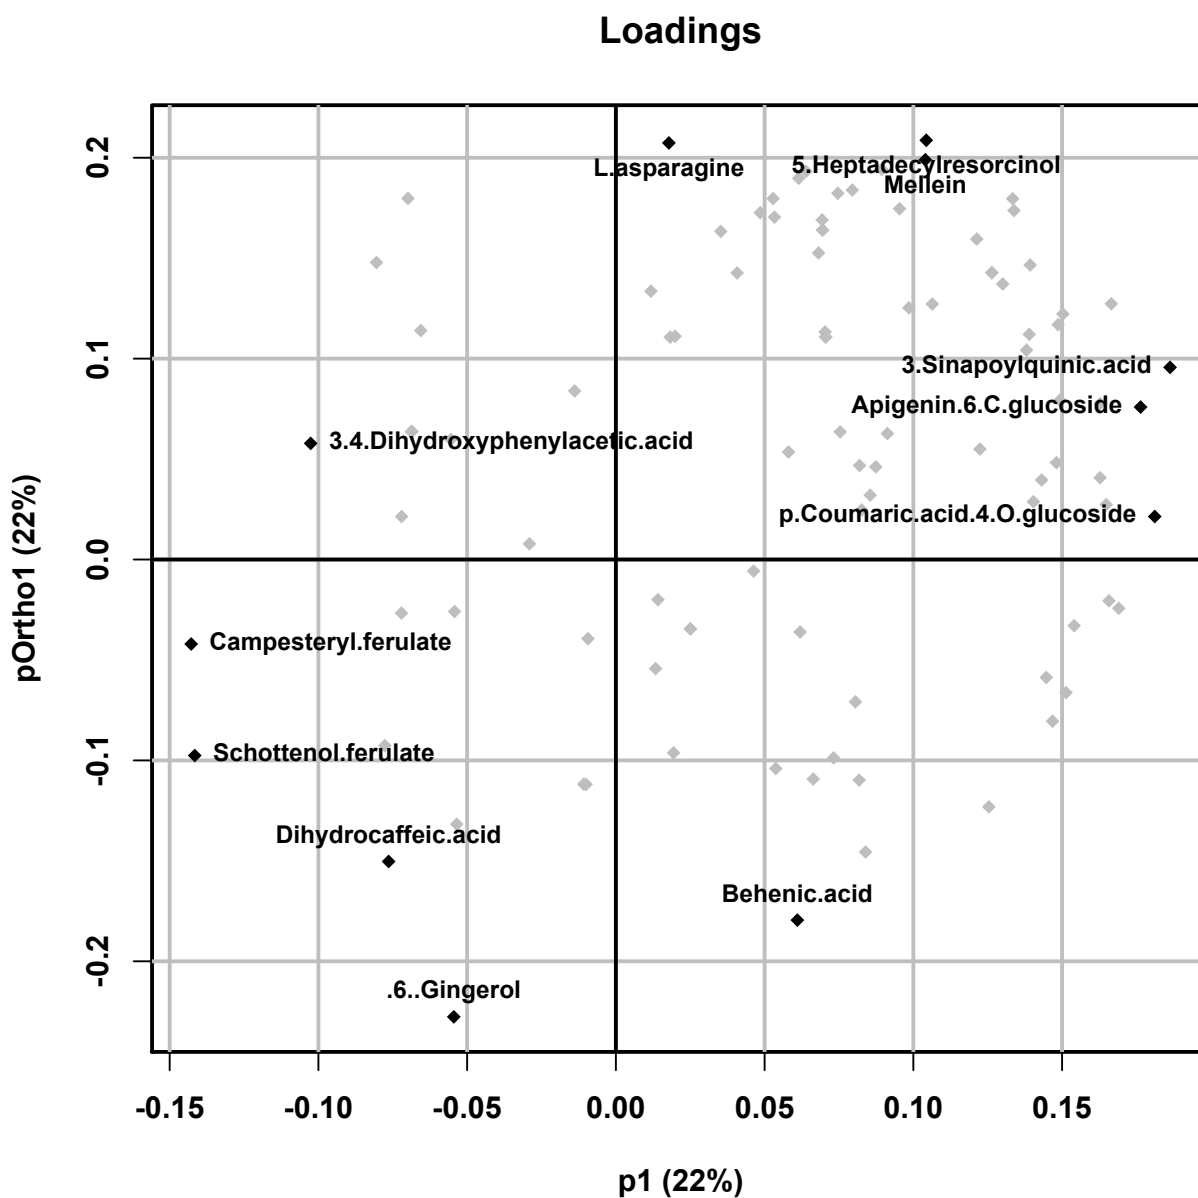

**Supplementary Fig. S9. OPLS-DA model of root exudate samples of 140R rootstocks sampled at 3 h.** OPLS-DA model (1P+2O,  $R^2X(\text{cum})=0.512$ ,  $R^2Y(\text{cum})=0.998$ ,  $Q^2(\text{cum})=0.741$ ,  $\text{RMSEE}=0.032$ ; scaling: mean-centering and unit variance scaling) of root exudates collected at 3 h from Fe-deficient and Fe-sufficient 140R microcuttings.

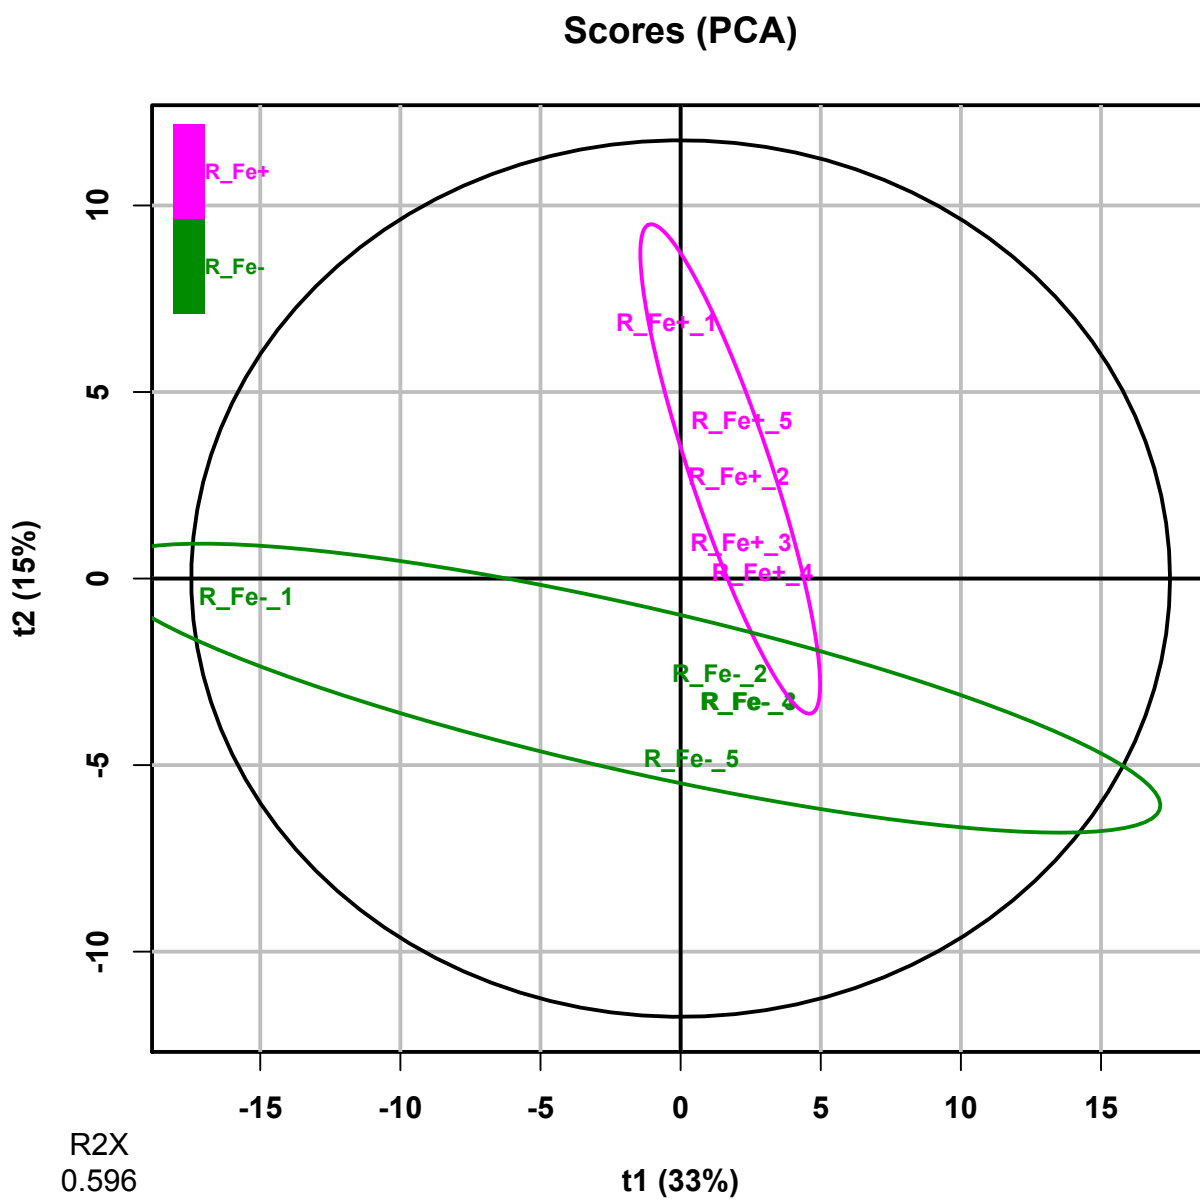

**Supplementary Fig. S10. PCA model of root exudate samples of Ramsey rootstocks sampled at 6 h.** PCA model ( $R^2X_{(cum)} = 0.596$ , 3 PCs; scaling: mean-centering and unit variance scaling) of root exudates collected at 6 h from Fe-deficient and Fe-sufficient Ramsey microcuttings.

### Scores (OPLS-DA)

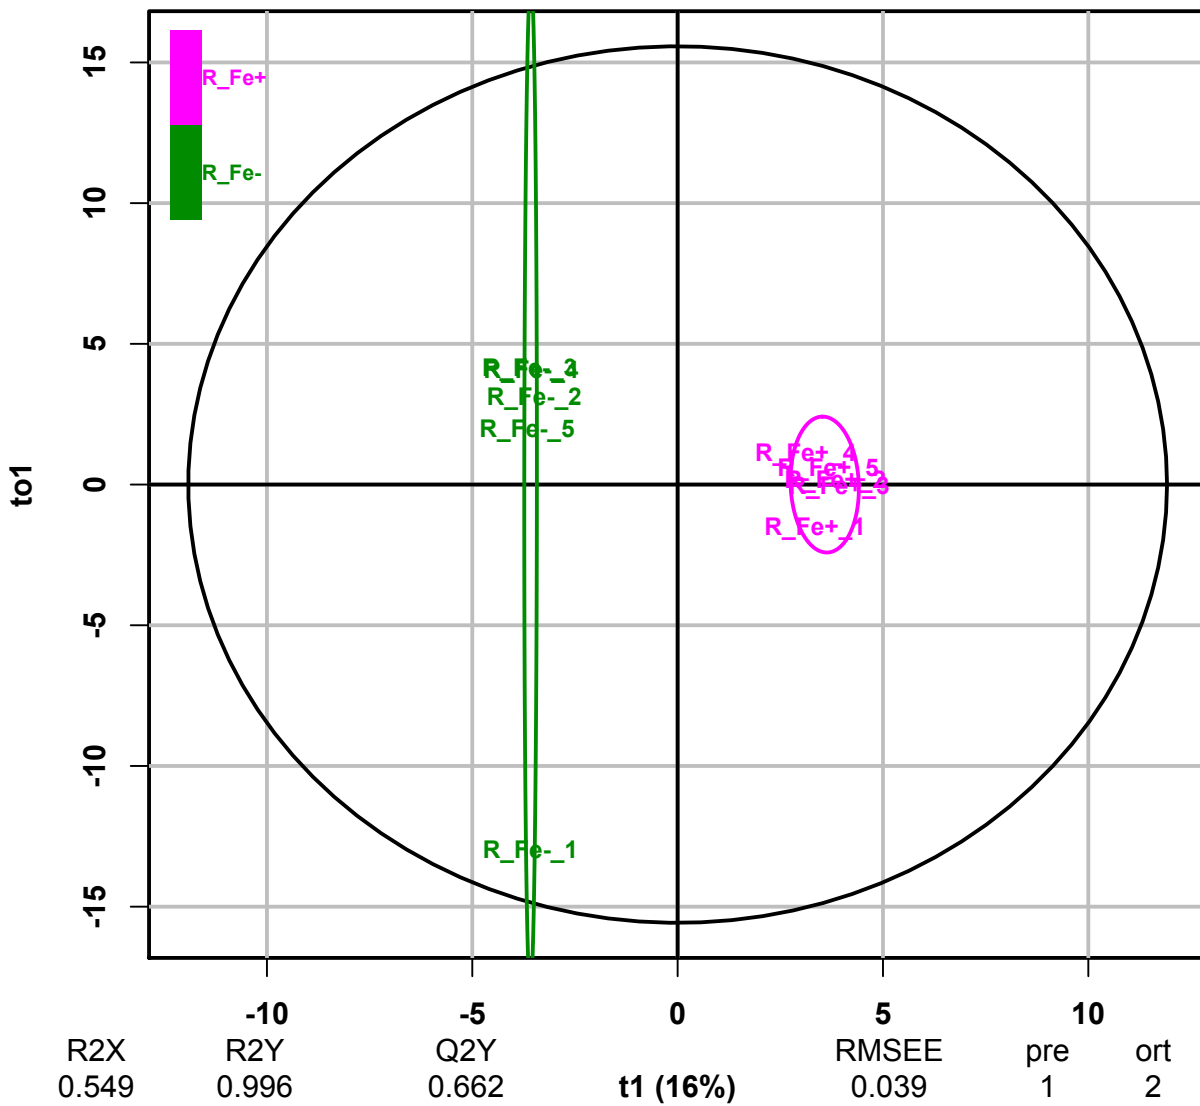

**Supplementary Fig. S11. OPLS-DA model of root exudate samples of Ramsey rootstocks sampled at 6 h.** Scatter plot of OPLS-DA model (1P+2O,  $R^2X(\text{cum})= 0.549$ ,  $R^2Y(\text{cum})= 0.996$ ,  $Q^2(\text{cum})= 0.662$ ,  $RMSEE= 0.039$ ; scaling: mean-centering and unit variance scaling) of root exudates collected at 6 h from Fe-deficient and Fe-sufficient Ramsey microcuttings.

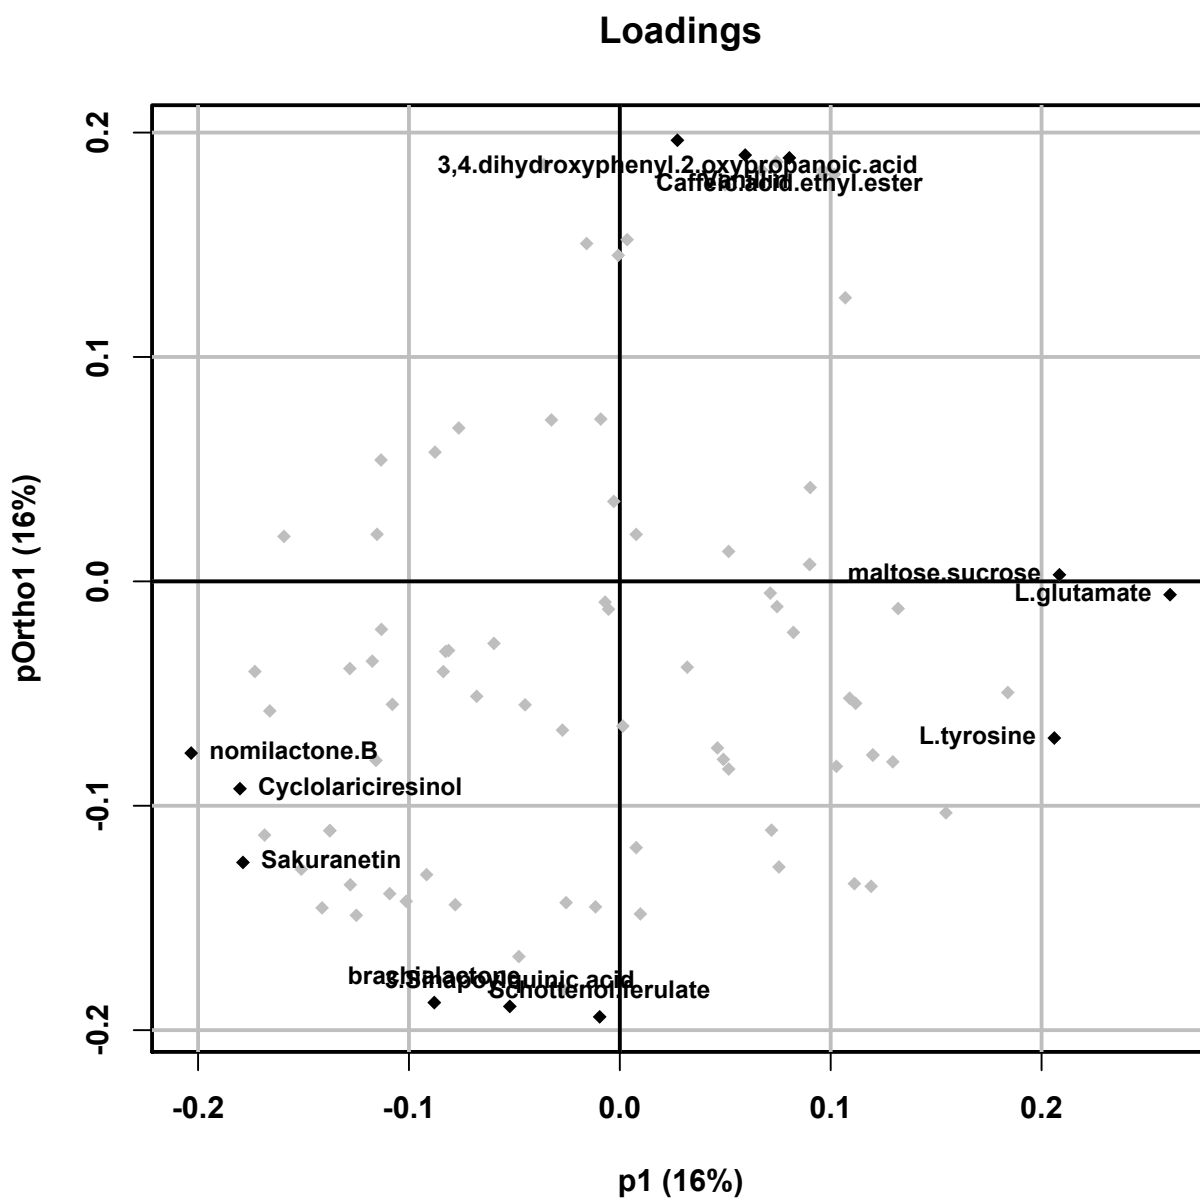

**Supplementary Fig. S12. OPLS-DA model of root exudate samples of Ramsey rootstocks sampled at 6 h.** Loading plot of OPLS-DA model (1P+2O,  $R^2X(\text{cum})= 0.549$ ,  $R^2Y(\text{cum})= 0.996$ ,  $Q^2(\text{cum})= 0.662$ ,  $\text{RMSEE}= 0.039$ ; scaling: mean-centering and unit variance scaling) of root exudates collected at 6 h from Fe-deficient and Fe-sufficient Ramsey microcuttings.

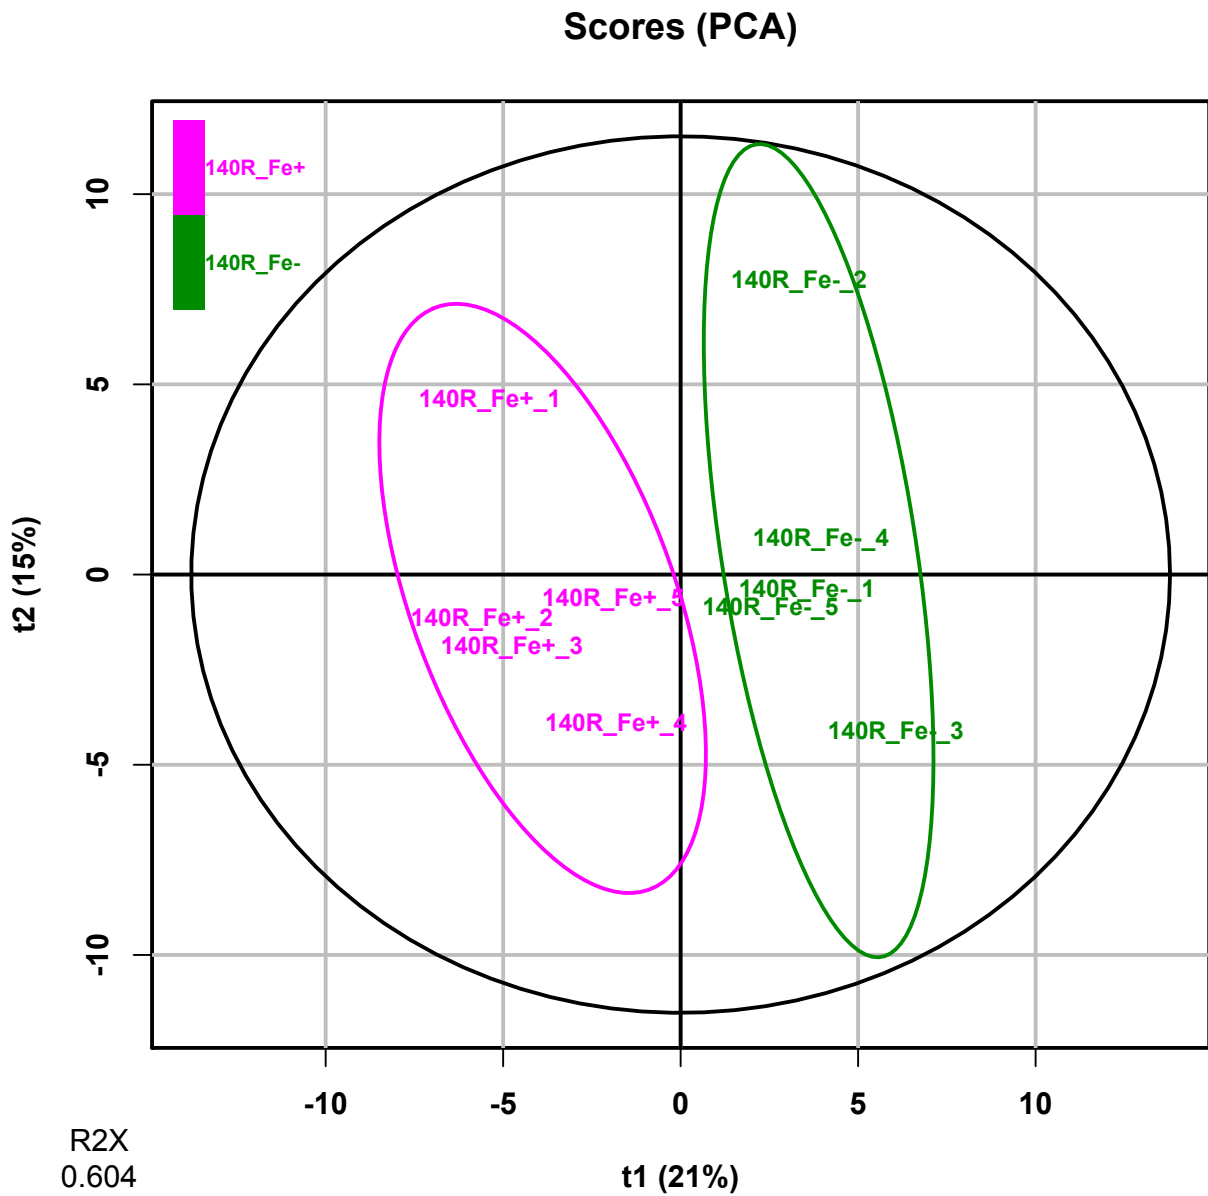

**Supplementary Fig. S13. PCA model of root exudate samples of 140R rootstocks sampled at 6 h.** Scatter plot of PCA model ( $R^2X_{(cum)} = 0.604$ , 4 PCs; scaling: mean-centering and unit variance scaling) of root exudates collected at 6 h from Fe-deficient and Fe-sufficient 140R microcuttings.

### Scores (OPLS-DA)

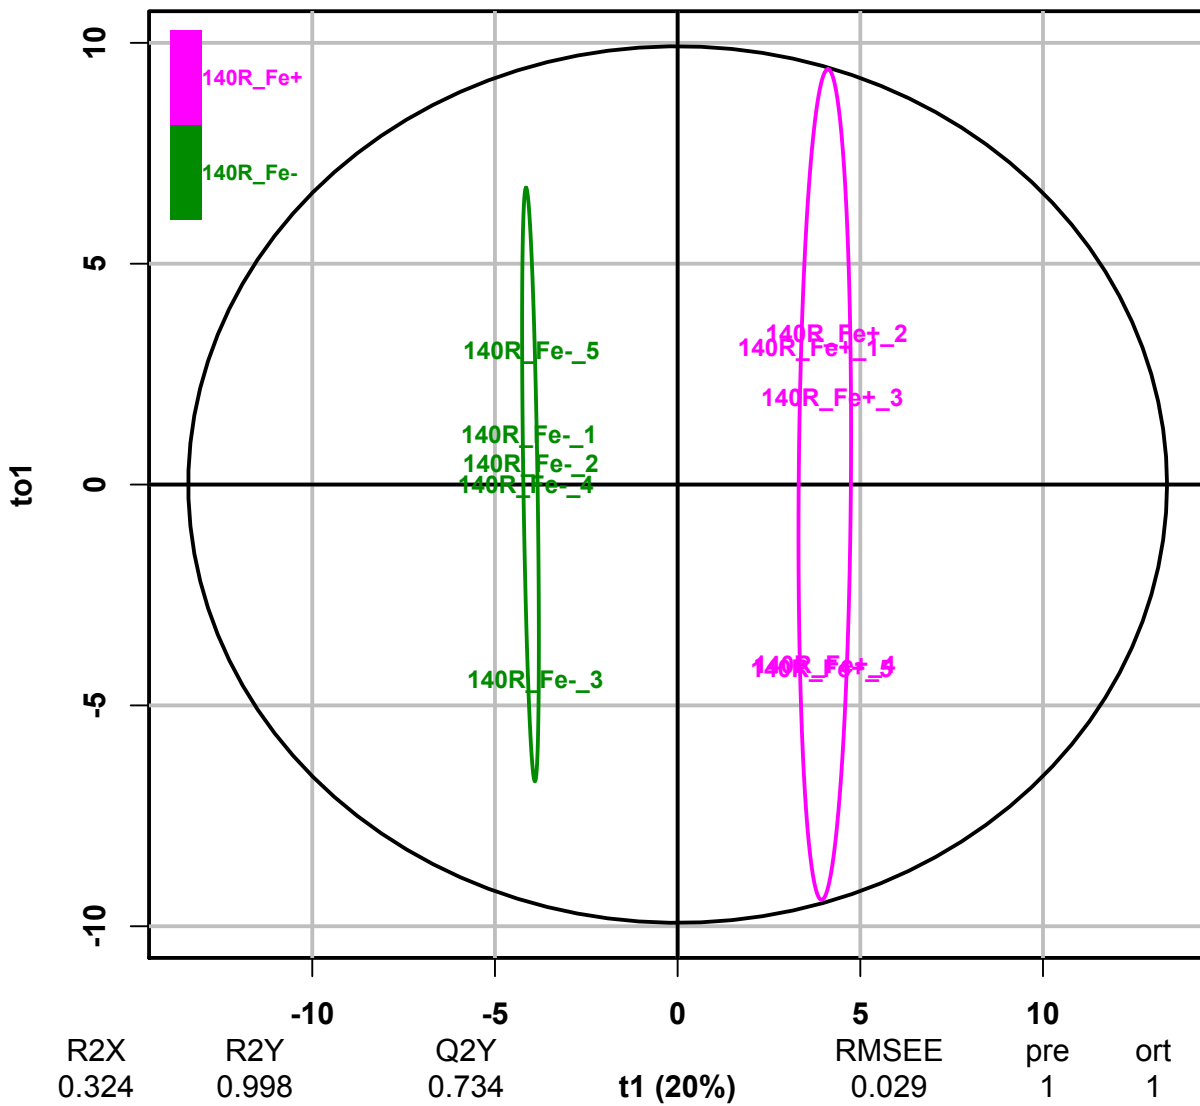

**Supplementary Fig. S14. OPLS-DA model of root exudate samples of 140R rootstocks sampled at 6 h.** Scatter plot of OPLS-DA model (1P+1O,  $R^2X(\text{cum})=0.324$ ,  $R^2Y(\text{cum})=0.998$ ,  $Q^2(\text{cum})=0.734$ ,  $RMSEE=0.029$ ; scaling: mean-centering and unit variance scaling) of root exudates collected at 6 h from Fe-deficient and Fe-sufficient 140R microcuttings.

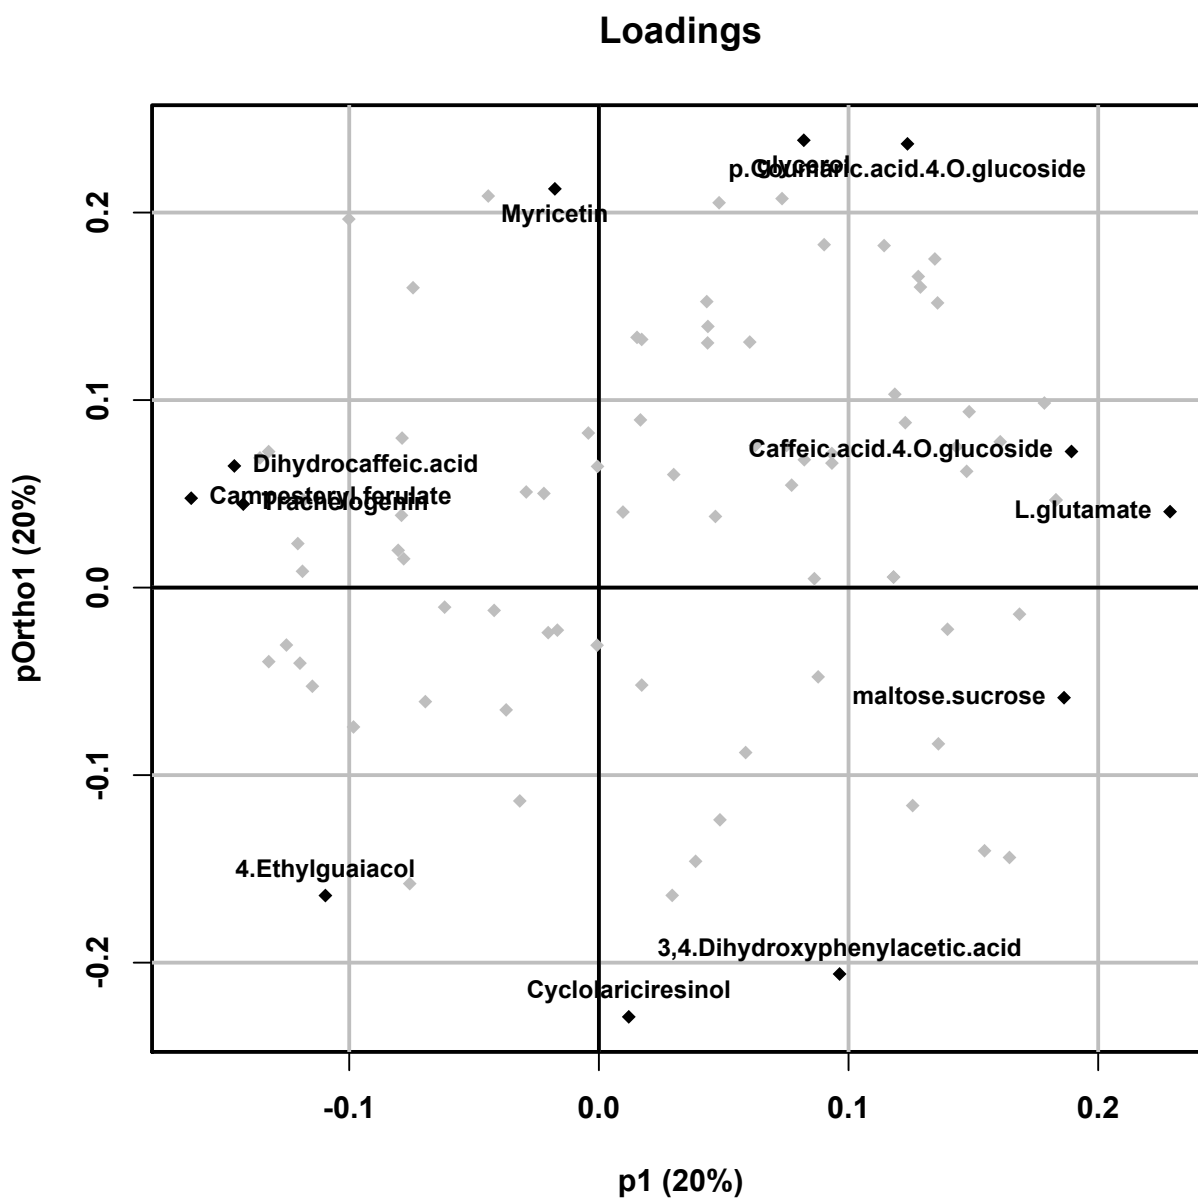

**Supplementary Fig. S15. OPLS-DA model of root exudate samples of 140R rootstocks sampled at 6 h.** Loading plot of OPLS-DA model (1P+1O,  $R^2X(\text{cum})=0.324$ ,  $R^2Y(\text{cum})=0.998$ ,  $Q^2(\text{cum})=0.734$ ,  $RMSEE=0.029$ ; scaling: mean-centering and unit variance scaling) of root exudates collected at 6 h from Fe-deficient and Fe-sufficient 140R microcuttings.



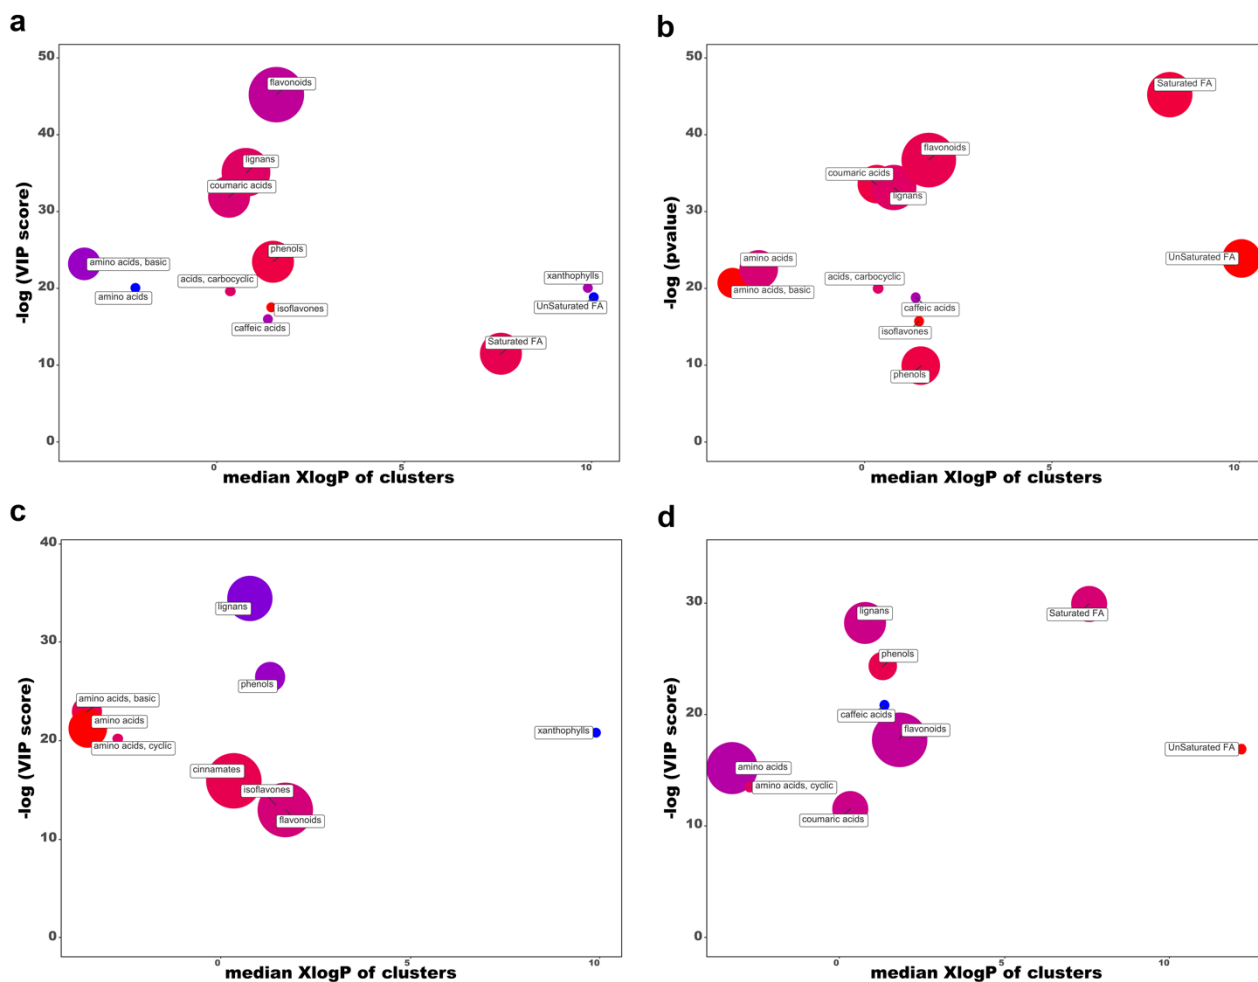

**Supplementary Fig. S16. Plots from Chemical similarity enrichment analysis.** Chemical similarity enrichment analysis based on VIP and fold-change ( $Fe^+$  vs  $Fe^-$ ) values of the metabolites identified **a** in Ramsey at 3 h, **b** in 140R at 3 h, **c** in Ramsey at 6 h and **d** in 140R at 6 h. Colour is according to proportion of increased or decreased compounds (red = increased, blue = decreased, pink = mixed) in each cluster. X-axis presents partition coefficient (XlogP values) of metabolite clusters, and the y-axis indicates the level of statistical significance by Kolmogorov–Smirnov test based on VIP scores.

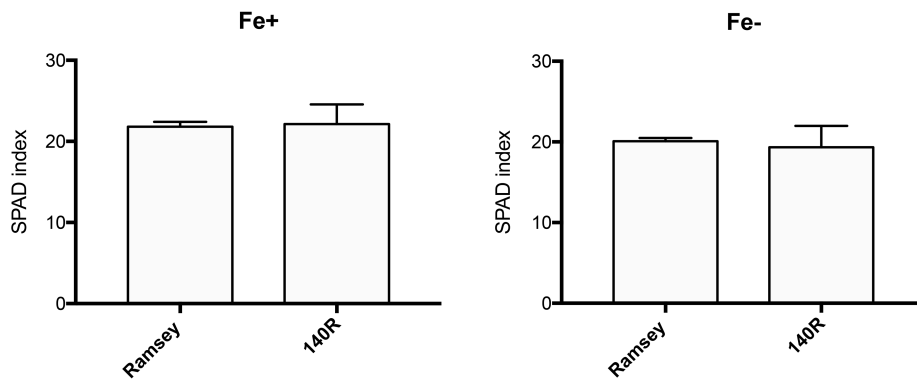

**Supplementary Fig. S17. Comparison of SPAD index values between Ramsey and 140R microcuttings.** SPAD values of Ramsey and 140R microcuttings grown in presence (Fe+) and in absence (Fe-) of Fe. The statistical significance was determined by Student's t-test (mean  $\pm$  SE, n= 3 independent growth experiments).

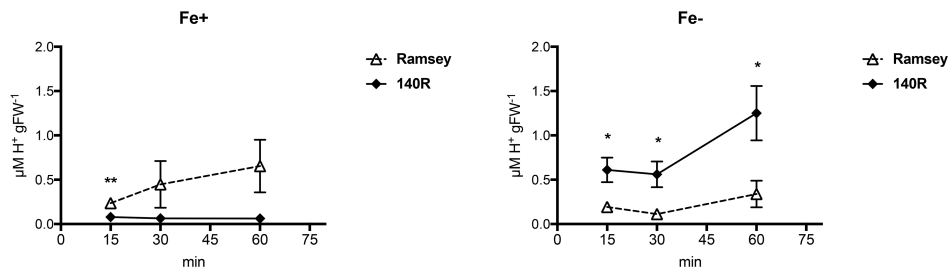

**Supplementary Fig. S18. Time-course of root H<sup>+</sup> release.** Comparison of H<sup>+</sup> extrusion by roots of Ramsey and 140R measured at 15, 30 and 60 min grown under Fe-sufficient and Fe-deficient condition. The statistical significance was determined by Student's t-test (mean ± SE, n= 4 plants, \* P < 0.05. \*\*, P < 0.01).
